# Supplementary material
Source: publisher figshare collection journal article supplement (https://diabetesjournals.figshare.com/articles/dataset/_/24840426)
Supplement: Supplementary file 1 [file 43688286]

## Supplementary Methods

**Culture of human embryonic kidney 293 (HEK293) cells.** HEK293 cells were cultured in Dulbecco's Modified Eagle's Medium (Thermo Fisher Scientific) supplemented with 10% fetal bovine serum and 1% penicillin-streptomycin (Thermo Fisher Scientific) and incubated in 5% CO<sub>2</sub> at 37 °C.

**Western blotting.** HEK293 cells were transfected using FuGENE HD (Promega) with 500 ng/mL of plasmid pcDNA3.1-HA-CCND1 (Addgene, 172649) and 500 ng/mL of *DYRK1B* plasmid (empty vector [EV], wild-type [WT] or with a P/LP-null variant) and they seeded in a poly-lysine coated 6-well plate at a concentration of 0.5×10<sup>6</sup> cells/mL. 48 hours after transfection, the cells were harvested and the proteins were extracted using Pierce RIPA buffer (Thermo Fischer Scientific), supplemented with 1 mM dithiothreitol (Thermo Fischer Scientific) and protease and phosphatase inhibitors (Roche). The proteins were quantified using Pierce Rapid Gold BCA protein assay kit (Thermo Fischer Scientific). 20 µg of proteins were denatured at 95 °C for 5 minutes with Laemmli buffer 4× (Thermo Fischer Scientific) and loaded on a 10% precast gel (Bio-Rad) for electrophoresis. After migration, the proteins were transferred on a nitrocellulose membrane (GE Healthcare) and the non-specific sites on the membranes were blocked for 1 hour in the blocking buffer (Tris buffered saline [TBS], 0.1% Tween 20, 5% bovine serine albumin). The membranes were then incubated overnight at 4°C with primary antibodies: DYRK1B (#5672 Cell signaling Technology; diluted at 1/1000 in the blocking buffer), phospho-CCND1 (at p.T286 amino acid) (#3300 Cell signaling Technology; diluted at 1/1000 in the blocking buffer) and CCND1 (Origene; diluted at 1/2000 in the blocking buffer), following by fluorescent anti-rabbit secondary antibody (SA5-35571 Thermo Fischer Scientific; diluted at 1/5000 in the blocking buffer) and fluorescent anti-mouse secondary antibody (#35518 Thermo Fischer Scientific; diluted at 1/5000 in the blocking buffer). Nitrocellulose membranes were revealed using the Odyssey CLx imaging system (LI-COR

Bioscience).  $\beta$ -actin was used as a loading control to normalize data (#3700 Cell Signaling Technology; diluted at 1/4000 in the blocking buffer).

**Table S1. Clinical data of participants included in the RaDiO study.**

|                                             | Adults             |                                    |                      |           | Children/adolescents |               |
|---------------------------------------------|--------------------|------------------------------------|----------------------|-----------|----------------------|---------------|
|                                             | Obesity            | Overweight<br>(with no<br>obesity) | Normal-<br>weight    | NA        | Obesity              | Normal-weight |
| <b><i>N</i></b>                             | 1,526              | 2,859                              | 2,875                | 8         | 1,043                | 1,042         |
| <b>Sex</b>                                  | M:514 /<br>F:1,012 | M:1,823 /<br>F:1,036               | M:1,252 /<br>F:1,623 | M:3 / F:5 | M:486 / F:557        | M:540 / F:502 |
| <b>Age at<br/>investigation<br/>(years)</b> | 51 ± 13            | 54 ± 12                            | 48 ± 12              | 45 ± 8.4  | 13 ± 2.1             | 18 ± 3.3      |
| <b>BMI (kg/m<sup>2</sup>)</b>               | 37 ± 7.3           | 27 ± 1.5                           | 22 ± 1.9             | NA        | 31 ± 5.4             | 20 ± 2.3      |
| <b>Type 2 Diabetes</b>                      | 537                | 1,144                              | 497                  | 1         | NA                   | NA            |
| <b>Fasting glucose<br/>(mmol/L)</b>         | 6.4 ± 2.4          | 6.5 ± 2.4                          | 8.3 ± 3              | 5.2 ± 0.3 | NA                   | NA            |

**Data are the mean ± SD or numbers (%)**

***BMI***, body mass index; ***F***, female; ***M***, male; ***NA***, not available.

**Table S2. Rare *DYRK1B* variants identified in the RaDiO study.**

| Rare variants in <i>DYRK1B</i> (NM_004714.3) | Position (hg19) | MAC in RaDiO | MAC in GnomAD | REVEL score | ACMG criteria       | Category  |
|----------------------------------------------|-----------------|--------------|---------------|-------------|---------------------|-----------|
| c.7G>A, p.V3I                                | 19:40322501     | 1            | 7             | 0.03        | -                   | Neutral   |
| c.14C>T, p.P5L                               | 19:40322494     | 1            | 1             | 0.14        | PS3, PM2            | P/LP      |
| c.80G>A, p.R27Q                              | 19:40321407     | 2            | 6             | 0.07        | -                   | Neutral   |
| c.92G>C, p.R31P                              | 19:40321395     | 1            | 0             | 0.24        | PM2                 | Neutral   |
| c.118G>T, p.A40S                             | 19:40321369     | 1            | 0             | 0.10        | PM2                 | Neutral   |
| c.170A>G, p.K57R                             | 19:40321317     | 1            | 3             | 0.19        | PM2                 | Neutral   |
| c.202A>C, p.K68Q                             | 19:40321185     | 1            | 5             | 0.23        | PS3, PP5            | Neutral   |
| c.209G>A, p.R70Q                             | 19:40321178     | 1            | 17            | 0.17        | PS3                 | Neutral   |
| c.236C>T, p.S79L                             | 19:40321151     | 1            | 2             | 0.14        | PM2                 | Neutral   |
| c.256_258del, p.K86del                       | 19:40321129     | 1            | 0             | -           | PS3, PM2, PM4       | P/LP      |
| c.305G>A, p.R102H                            | 19:40321082     | 2            | 8             | 0.06        | PS3, PM5            | P/LP      |
| c.359G>T, p.G120V                            | 19:40321028     | 1            | 0             | 0.97        | PS3-null, PM2, PP3  | P/LP-null |
| c.391C>T, p.H131Y                            | 19:40320649     | 1            | 0             | 0.39        | PS3, PM2            | P/LP      |
| c.470G>A, p.R157Q                            | 19:40320570     | 1            | 1             | 0.31        | PS3, PM2            | P/LP      |
| c.500C>T, p.T167M                            | 19:40320540     | 1            | 10            | 0.36        | PS3                 | Neutral   |
| c.506T>G, p.M169R                            | 19:40320534     | 2            | 0             | 0.39        | PM2                 | Neutral   |
| c.515A>G, p.Y172C                            | 19:40320525     | 1            | 3             | 0.40        | PM2                 | Neutral   |
| c.526C>A, p.L176M                            | 19:40319218     | 1            | 16            | 0.18        | PS3                 | Neutral   |
| c.536A>T, p.H179L                            | 19:40319208     | 1            | 0             | 0.65        | PS3-null, PM2, PP3  | P/LP-null |
| c.668C>T, p.T223M                            | 19:40319076     | 3            | 30            | 0.40        | PS3                 | Neutral   |
| c.746A>G, p.N249S                            | 19:40318998     | 2            | 1             | 0.29        | PM2                 | Neutral   |
| c.775G>A, p.D259N                            | 19:40318969     | 1            | 0             | 0.90        | PS3-null, PM2, PP3  | P/LP-null |
| c.845C>T, p.P282L                            | 19:40318259     | 1            | 0             | 0.86        | PS3-null, PM2, PP3  | P/LP-null |
| c.967A>G, p.N323D                            | 19:40318053     | 1            | 0             | 0.23        | PS3, PM2            | P/LP      |
| c.971G>T, p.R324L                            | 19:40318049     | 1            | 5             | 0.21        | PS3                 | Neutral   |
| c.1003G>A, p.A335T                           | 19:40318017     | 4            | 3             | 0.09        | PM2                 | Neutral   |
| c.1030C>T, p.R344C                           | 19:40317990     | 2            | 8             | 0.42        | -                   | Neutral   |
| c.1031G>A, p.R344H                           | 19:40317989     | 2            | 14            | 0.26        | -                   | Neutral   |
| c.1045C>T, p.R349W                           | 19:40317975     | 1            | 1             | 0.23        | PS3-null, PM2       | P/LP-null |
| c.1046G>A, p.R349Q                           | 19:40317974     | 1            | 2             | 0.09        | PM2                 | Neutral   |
| c.1054G>A, p.G352R                           | 19:40317966     | 1            | 0             | 0.15        | PS3, PM2            | P/LP      |
| c.1055G>C, p.G352A                           | 19:40317965     | 5            | 155           | 0.06        | -                   | Neutral   |
| c.1057G>T, p.G353C                           | 19:40317963     | 1            | 1             | 0.25        | PS3, PM2            | P/LP      |
| c.1072C>T, p.R358*                           | 19:40317948     | 1            | 0             | -           | PVS1, PS3-null, PM2 | P/LP-null |
| c.1073G>A, p.R358Q                           | 19:40317947     | 1            | 4             | 0.06        | PS3, PM2            | P/LP      |
| c.1079C>A, p.T360K                           | 19:40317941     | 1            | 0             | 0.07        | PS3, PM2            | P/LP      |
| c.1111G>A, p.G371R                           | 19:40317612     | 3            | 2             | 0.19        | PS3, PM2            | P/LP      |
| c.1111G>C, p.G371R                           | 19:40317612     | 1            | 1             | 0.20        | PS3, PM2            | P/LP      |
| c.1196C>A, p.A399D                           | 19:40317527     | 1            | 0             | 0.08        | PM2                 | Neutral   |
| c.1208G>A, p.R403H                           | 19:40317515     | 1            | 1             | 0.16        | PM2                 | Neutral   |
| c.1229G>A, p.R410H                           | 19:40317494     | 1            | 0             | 0.48        | PS3, PM2            | P/LP      |
| c.1252G>A, p.A418T                           | 19:40317471     | 9            | 22            | 0.03        | -                   | Neutral   |
| c.1285G>A, p.G429S                           | 19:40317438     | 3            | 103           | 0.06        | -                   | Neutral   |
| c.1285G>C, p.G429R                           | 19:40317438     | 3            | 5             | 0.09        | -                   | Neutral   |
| c.1295G>A, p.R432H                           | 19:40317428     | 1            | 1             | 0.10        | PM2                 | Neutral   |
| c.1328C>T, p.P443L                           | 19:40317395     | 1            | 0             | 0.06        | PM2                 | Neutral   |
| c.1336A>G, p.S446G                           | 19:40317387     | 3            | 11            | 0.07        | -                   | Neutral   |
| c.1341T>A, p.S447R                           | 19:40317382     | 1            | 0             | 0.28        | PS3, PM2            | P/LP      |
| c.1349C>T, p.T450I                           | 19:40317374     | 1            | 0             | 0.19        | PM2                 | Neutral   |
| c.1358C>T, p.A453V                           | 19:40317365     | 1            | 5             | 0.09        | -                   | Neutral   |
| c.1386C>G, p.S462R                           | 19:40317337     | 5            | 101           | 0.15        | -                   | Neutral   |
| c.1414G>A, p.G472S                           | 19:40316924     | 2            | 0             | 0.25        | PM2                 | Neutral   |
| c.1441C>T, p.R481W                           | 19:40316897     | 1            | 0             | 0.18        | PM2                 | Neutral   |
| c.1450C>T, p.R484C                           | 19:40316888     | 1            | 7             | 0.24        | -                   | Neutral   |
| c.1463G>A, p.R488Q                           | 19:40316875     | 1            | 14            | 0.13        | -                   | Neutral   |
| c.1469G>T, p.C490F                           | 19:40316869     | 1            | 0             | 0.06        | PM2                 | Neutral   |
| c.1470T>G, p.C490W                           | 19:40316868     | 3            | 8             | 0.21        | -                   | Neutral   |
| c.1481G>A, p.G494E                           | 19:40316857     | 1            | 11            | 0.11        | -                   | Neutral   |
| c.1675C>T, p.P559S                           | 19:40316570     | 1            | 2             | 0.09        | PM2                 | Neutral   |

|                    |             |    |     |      |          |         |
|--------------------|-------------|----|-----|------|----------|---------|
| c.1732C>T, p.P578S | 19:40316513 | 31 | 294 | 0.05 | -        | Neutral |
| c.1742C>T, p.A581V | 19:40316503 | 1  | 2   | 0.16 | PM2      | Neutral |
| c.1799G>A, p.R600H | 19:40316446 | 1  | 5   | 0.06 | -        | Neutral |
| c.1823A>T, p.D608V | 19:40316422 | 1  | 0   | 0.14 | PM2      | Neutral |
| c.1840C>A, p.P614T | 19:40316405 | 2  | 38  | 0.05 | -        | Neutral |
| c.1855C>T, p.R619C | 19:40316390 | 1  | 6   | 0.04 | PS3-null | Neutral |

**ACMG**, American College of Medical Genetics and Genomics; **GnomAD**, genome aggregation database (version 2.1.1); **MAC**, minor allele count; **P/LP**, pathogenic or likely pathogenic variant; **P/LP-null**, fully inhibitory (*i.e.* null) P/LP variant; **PM-**, moderate pathogenicity ACMG criterion; **PP-**, supporting pathogenicity criterion; **PS-**, strong pathogenicity ACMG criterion; **PVS-**, very strong pathogenicity ACMG criterion; **REVEL**, rare exome variant ensemble learner.

**Table S3. Null mutations of *DYRK1B* (NM\_004714.3) detected in 52K and TOPMed studies.**

| Chr | Position (Hg38) | Mutation                            | 52K | TOPMed |
|-----|-----------------|-------------------------------------|-----|--------|
| 19  | 40321205        | c.184-3_184-2insGGGC                |     | X      |
| 19  | 40318298        | c.808-2A>C                          |     | X      |
| 19  | 40318281        | c.823C>T, p.Gln275Ter               | X   | X      |
| 19  | 40316889        | c.1449C>G, p.Tyr483Ter              | X   | X      |
| 19  | 40316876        | c.1462C>T, p.Arg488Ter              |     | X      |
| 19  | 40316713        | c.1528_1531del, p.Gln511ArgfsTer52  |     | X      |
| 19  | 40316611        | c.1633del, p.Gln545SerfsTer19       |     | X      |
| 19  | 40316611        | c.1633_1634insC, p.Gln545ProfsTer30 |     | X      |
| 19  | 40316491        | c.1753_1754insC, p.Gln585ProfsTer23 |     | X      |

Among these variants, two null variants from 52K and seven null variants from TOPMed were kept for further association analysis with type 2 diabetes risk.

**Fig. S1. Effect of neutral *DYRK1B* variants on Wnt signaling, according to luciferase assays**

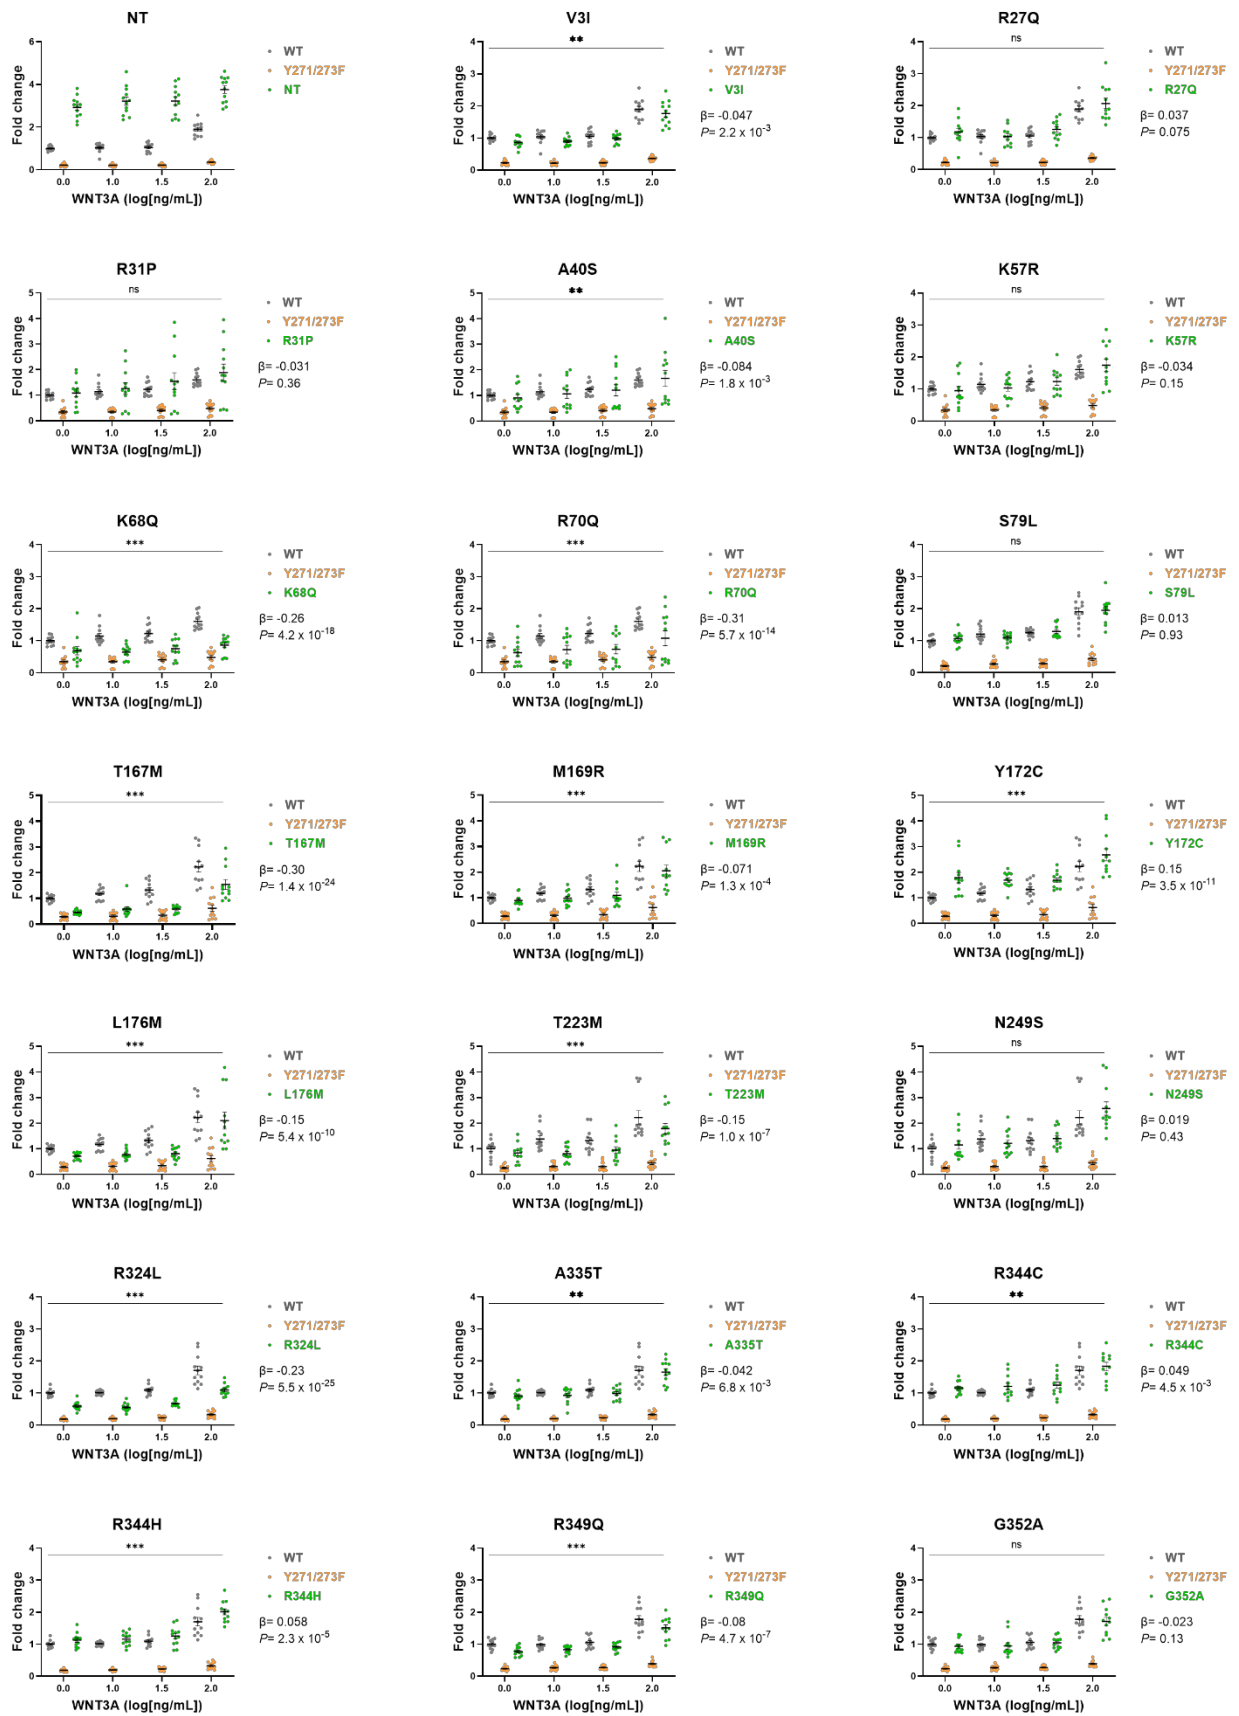

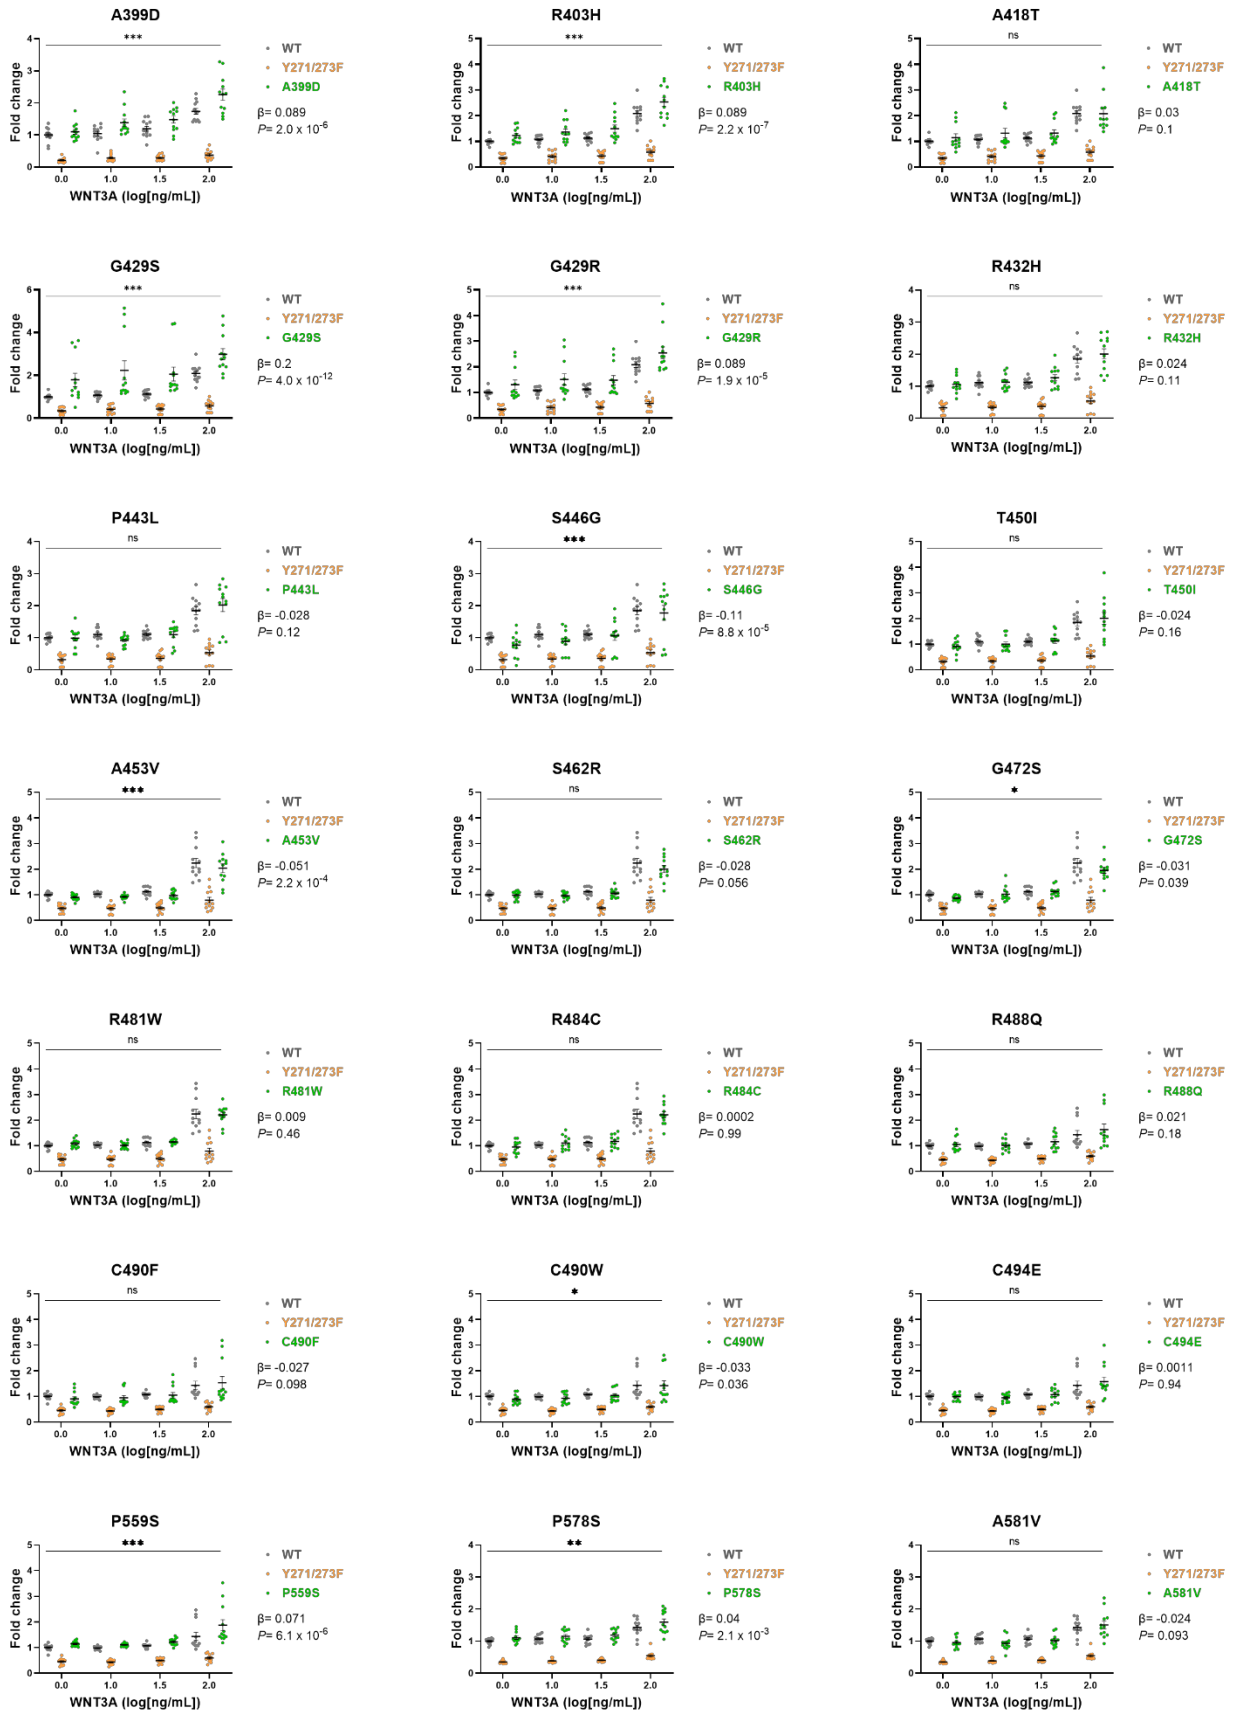



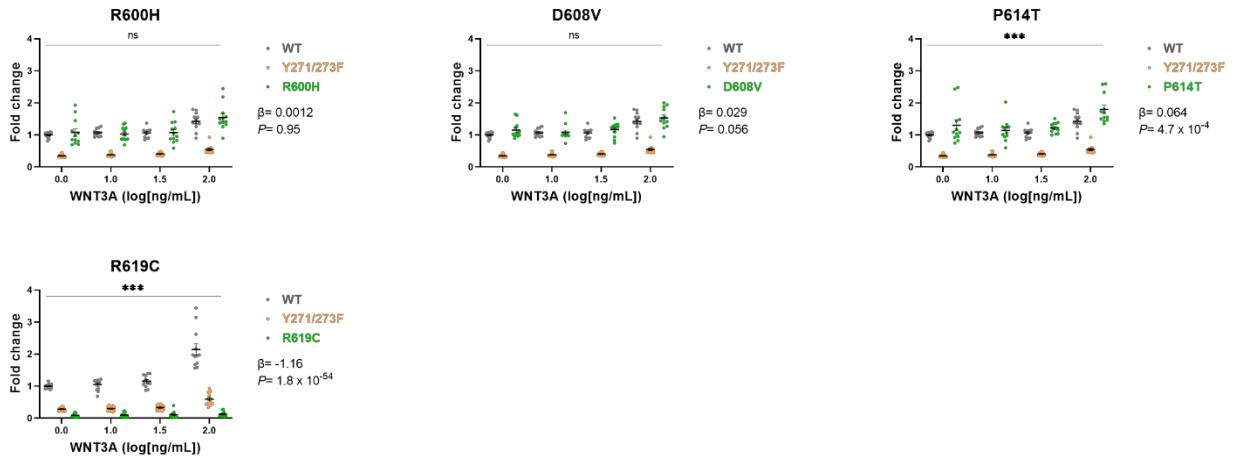

The figures illustrate fold changes in luciferase activity, normalized to  $\beta$ -galactosidase, within HEK293 cells that were either transfected or left non-transfected (designated as the non-transfected [NT] condition). This transfection involved the use of wild-type or mutated *DYRK1B* plasmids, along with the TOPflash (*i.e.* TCF reporter) plasmid. The response was measured across varying concentrations of WNT3A (0, 10, 30, and 100 ng/mL), relative to the baseline activity observed with the wild-type *DYRK1B*. Positive and negative control conditions, *i.e.* WT and Y271/273F, were respectively represented in grey and orange. Data are the mean  $\pm$  SEM of the fold changes from four independent experiments performed in technical triplicates. The effect of each *DYRK1B* variant was analysed using linear regression model (with estimates and p-values on the right) and confirmed with ANOVA model (\* $P < 0.05$ ; \*\* $P < 0.01$ ; \*\*\* $P < 0.001$  versus wild-type). *NT*, not transfected; *WT*, wild-type.

**Fig S2. Effect of P/LP-null *DYRK1B* variants on CCND1 by phosphorylation by Western blotting**

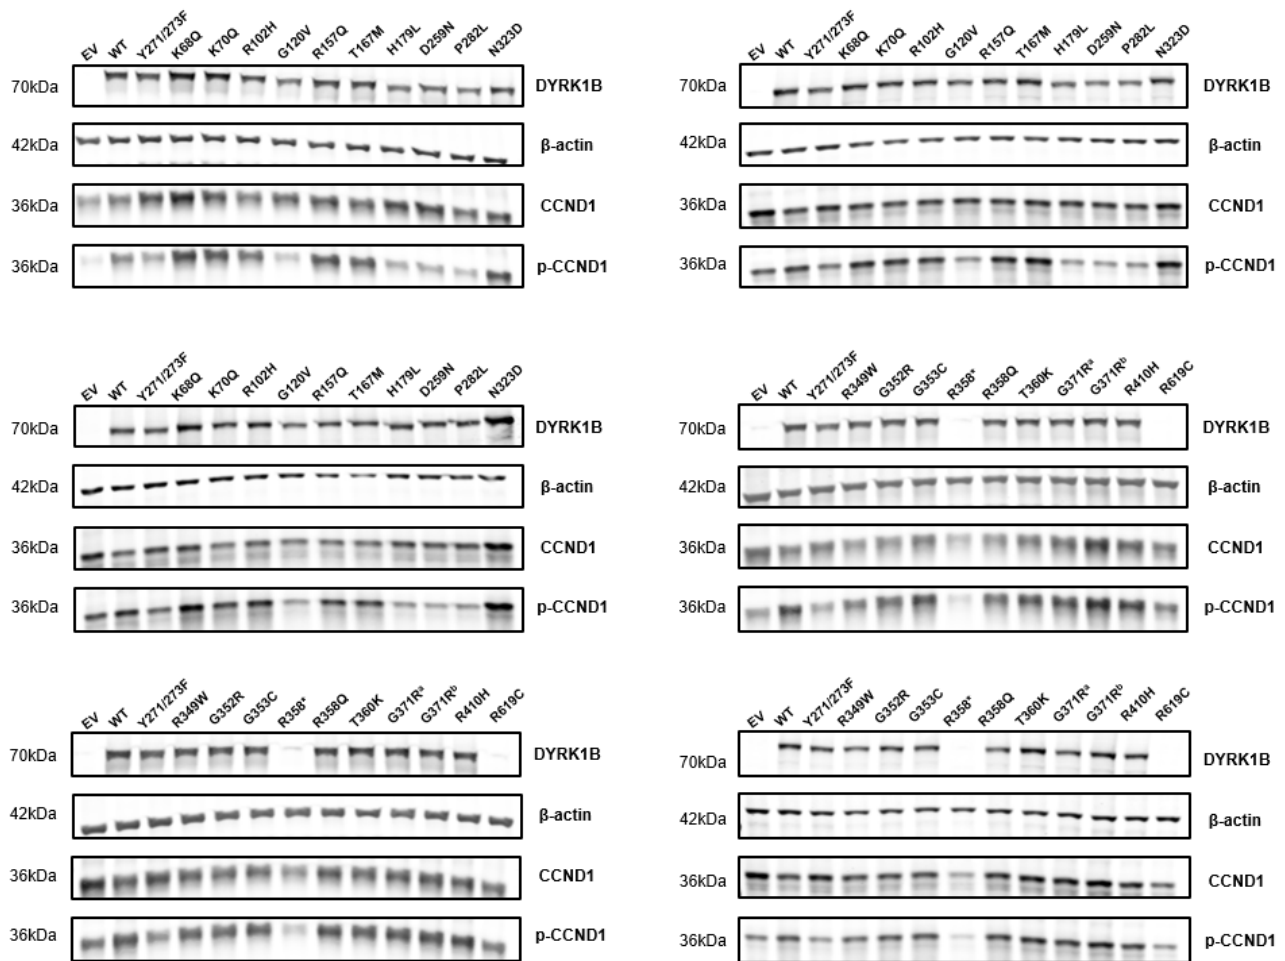

The figures illustrate the protein expression of DYRK1B, CCND1 and p-CCND1 within transfected HEK293 cells. This transfection involved the use of empty vector or wild-type or P/LP-null *DYRK1B* plasmids, along with CCND1 plasmid. Four independent experiments were performed for each P/LP-null variant. *EV*, empty vector; *WT*, wild-type; *CCND1*, cyclin D1; *p-CCND1*, CCND1 phosphorylated.

**Fig S3. Co-segregation of p.H179L and p.R358\* with metabolic traits in two families**

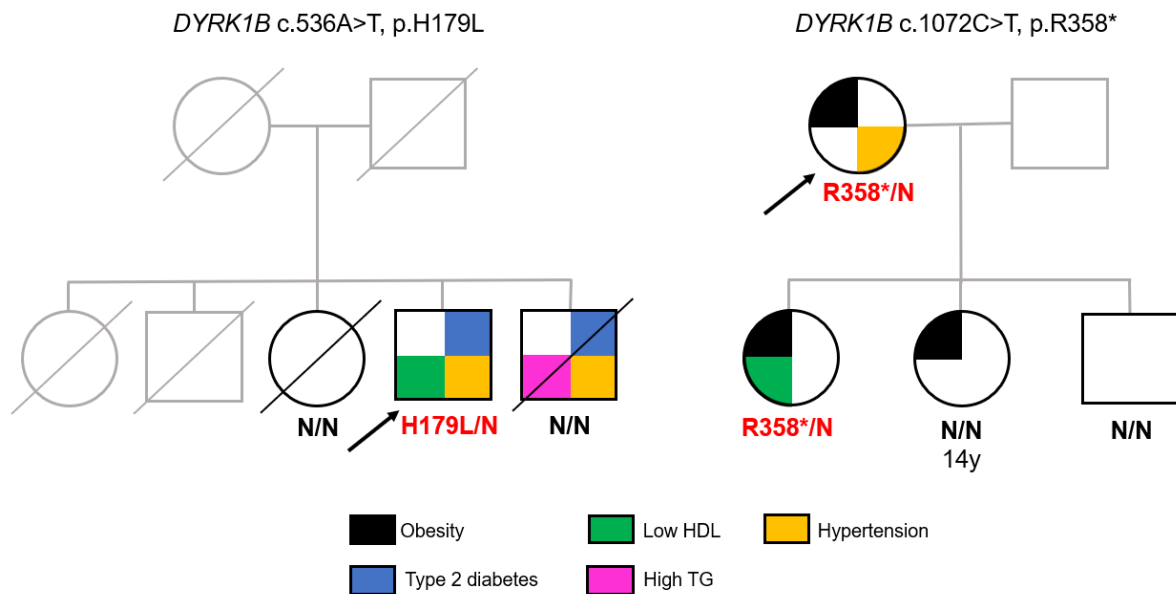

The figure shows the co-segregation of two P/LP-null variants (p.H179L and p.R358\*) with metabolic traits in two families. The arrows indicate the individual sequenced in the RaDiO study. Family members were sequenced by Sanger sequencing. Obesity was defined as BMI  $\geq 30$  kg/m<sup>2</sup>, Type 2 diabetes as fasting glucose  $\geq 7.0$  mmol/l and/or used treatment of hyperglycemia, low HDL levels as  $\leq 1.04$  mmol/l in men and  $\leq 1.30$  mmol/l in women, high TG levels as  $\geq 1.70$  mmol/l and hypertension by systolic blood pressure  $\geq 130$  mmHg or diastolic blood pressure  $\geq 85$  mmHg. *NN*, wild-type; *HDL*, high-density lipoprotein; *TG*, triglyceride.
